# Supplementary material for: Profiling SARS-CoV-2 mutation fingerprints that range from the viral pangenome to individual infection quasispecies
Source: bioRxiv or medRxiv preprint supplement (doi:10.1101/2020.11.02.20224816), 2020-11-04
Supplement: Supplementary file [file media-1.pdf]

## **SUPPLEMENTARY MATERIALS**

### **TITLE**

Profiling SARS-CoV-2 mutation fingerprints that range from the viral pangenome to individual infection quasispecies

### **Authors**

Billy T. Lau<sup>1,2,†</sup>, Dmitri Pavilichin<sup>1,†</sup>, Anna C. Hooker<sup>1,†</sup>, Alison Almeda<sup>1</sup>, Giwon Shin<sup>1</sup>, Jiamin Chen<sup>1</sup>, Malaya K. Sahoo<sup>3</sup>, ChunHong Huang<sup>3</sup>, Benjamin A. Pinsky<sup>3,4</sup>, HoJoon Lee<sup>1</sup>, Hanlee P. Ji<sup>1,2</sup>

<sup>†</sup>These authors contributed equally to this work.

### **Institutions**

<sup>1</sup>Division of Oncology, Department of Medicine, Stanford University School of Medicine, Stanford, CA, 94305, United States

<sup>2</sup>Stanford Genome Technology Center West, Stanford University, Palo Alto, CA, 94304, United States

<sup>3</sup>Department of Pathology, Stanford University School of Medicine, Stanford, CA, 94305, United States

<sup>4</sup>Department of Medicine, Division of Infectious Diseases and Geographic Medicine, Stanford University School of Medicine, Stanford, CA, 94305, United States

### **Corresponding authors**

Hanlee P. Ji Email: [genomics\\_ji@stanford.edu](mailto:genomics_ji@stanford.edu)

HoJoon Lee Email: [hojoon@stanford.edu](mailto:hojoon@stanford.edu)

Division of Oncology, Department of Medicine – Stanford University School of Medicine  
269 Campus Drive, CCSR 1120, Stanford, CA 94305-5151

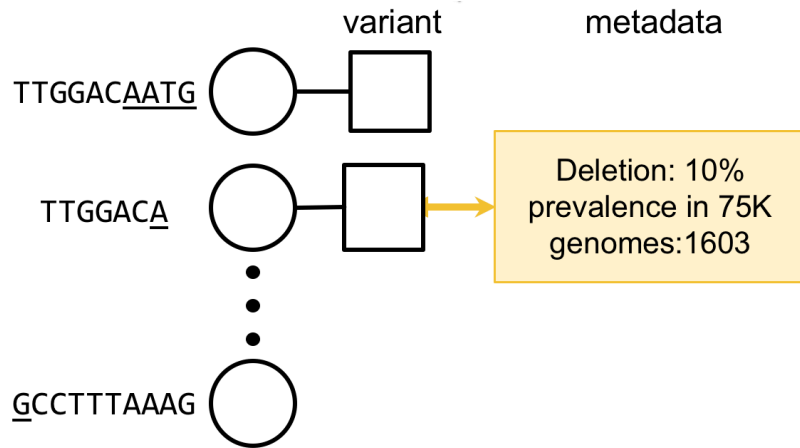

**Supplementary Figure 1. Metadata kmer indexing for mutations.** We incorporated metadata annotating mutation features from the k-mer derived from individual SARS-CoV-2 genomes present in GISAID. This metadata includes the nature of the mutation and its frequency among the sample set.

## SUPPLEMENTARY TABLES

**Supplementary Table 1.** Genome assemblies included pangenome k-mer study.

| <b>Organism or virus</b>       | <b>Number of unique genome assemblies</b> |
|--------------------------------|-------------------------------------------|
| SARS-CoV-2                     | 3,968                                     |
| Bacterial genomes              | 89                                        |
| GRCh38                         | 1                                         |
| Influenza genomes              | 42                                        |
| Other human-host viruses       | 321                                       |
| Other human-host coronaviruses | 447                                       |

**Supplementary Table 2.** K-mer filter criteria for primer design and selection.

| <b>Filter criterion</b>                               | <b># 21-mers</b> | <b># 23-mers</b> | <b># 25-mers</b> | <b># 27-mers</b> | <b># 29-mers</b> |
|-------------------------------------------------------|------------------|------------------|------------------|------------------|------------------|
| All k-mers in 3,968 SARS-CoV-2 genomes                | 84276            | 89348            | 94402            | 99446            | 104488           |
| and conserved and unique in all SARS-CoV-2 genomes    | 2777             | 2347             | 1977             | 1664             | 1406             |
| and max k-5 match to 89 bacteria genomes              | 1                | 402              | 1408             | 1584             | 1397             |
| and max k-3 bp match to human genome (GRCh38)         | 0                | 289              | 1336             | 1575             | 1397             |
| and max k-5 bp match to 42 influenza genomes          | 0                | 289              | 1336             | 1575             | 1397             |
| and max k-5 bp match to 321 other human viruses       | 0                | 259              | 1313             | 1573             | 1397             |
| and max k-5 bp match to 447 other human coronaviruses | 0                | 63               | 433              | 637              | 642              |

**Supplementary Table 3.** Accession numbers of genomes included in *in silico* cross-reactivity analyses.

| <b>Bacteria/Virus</b>             | <b>Accession Numbers</b>                                                     |
|-----------------------------------|------------------------------------------------------------------------------|
| <i>Chlamydia pneumoniae</i>       | CP001713.1, AE009440.1, AE009440.1                                           |
| <i>Haemophilus influenza</i>      | CP031689.1, NC_000907.1                                                      |
| <i>Legionella pneumophila</i>     | CP041668.1, CP025491.2                                                       |
| <i>Mycobacterium tuberculosis</i> | CP000717.1                                                                   |
| <i>Streptococcus pneumoniae</i>   | CP007593.1, CP001845.1                                                       |
| <i>Streptococcus pyogenes</i>     | AE009949.1                                                                   |
| <i>Pneumocystis jirovecii</i>     | AY685194.1, AY127566.1, AY130996.1, JX499143.1                               |
| <i>Candida albicans</i>           | NC_002653.1, NC_002653.1, NC_002653.1                                        |
| <i>Pseudomonas aeruginosa</i>     | NZ_CP040684.1, NZ_CP027174.1, NZ_CP007147.1                                  |
| <i>Staphylococcus epidermidis</i> | NZ_CP018842.1                                                                |
| <i>Streptococcus salivarius</i>   | NZ_CP040804.1, NZ_CP018187.1, NZ_CP018189.1, NZ_CP020451.2, NZ_CP020451.2    |
| Human metapneumovirus             | KJ627397.1, AY525843.1, KJ627383.1, AF371337.2                               |
| Parainfluenza virus 1             | M14887.1, AF457102.1, KF687307.1, AF457102.1, KX639498.1                     |
| Parainfluenza virus 2             | NC_003443.1, AF533011.1, KM190939.1                                          |
| Parainfluenza virus 3             | KM190938.1, KY973556.1, MH678682.1                                           |
| Parainfluenza virus 4             | NC_021928.1, MH892407.1, KY460515.1, KF483663.1                              |
| Influenza A virus                 | AB827993.1, AB818499.1, NC_007367.1, HE589468.1, AB822988.1, NC_007371.1     |
| Influenza B virus                 | NC_002206.1, NC_002211.1, NC_002205.1, NC_002207.1, NC_002205.1, NC_002211.1 |
| Enterovirus                       | KP202389.1, MK593172.1, FJ445142.1, FJ445125.1, AB647318.1                   |
| Rhinovirus                        | MG950178.1, DQ473499.1, FJ445142.1, FJ445174.1, FJ445125.1, FJ445147.1       |

**Supplementary Table 4.** Multiplexed PCR primers used for amplicon generation and subsequent Illumina sequencing.

| Primer pair # | Target             | Forward primers     |          |                           | Reverse primers     |          |                            | Amplicon length (kb) |
|---------------|--------------------|---------------------|----------|---------------------------|---------------------|----------|----------------------------|----------------------|
|               |                    | Genomic coordinates |          | Sequence                  | Genomic coordinates |          | Sequence                   |                      |
|               |                    | Start               | End      |                           | Start               | End      |                            |                      |
| 1             | SARS-CoV-2         | 1821                | 1845     | GTGCCTGGAATATTGGTGAACAGAA | 3048                | 3072     | CAATCACCTTCTTCTTCATCCTCAT  | 1.252                |
| 3             | SARS-CoV-2         | 7450                | 7474     | AAGTTATGTGCATGTTGTAGACGGT | 8495                | 8519     | TAACAACCTTGCTAGTAGTTGCACA  | 1.070                |
| 4             | SARS-CoV-2         | 9971                | 9995     | AAGGCTCTCAATGACTTCAGTAACT | 12446               | 12470    | TGGCTGCTGTTGTAAGAGGTATTAT  | 2.500                |
| 6             | SARS-CoV-2         | 16264               | 16288    | TCACAGACTTCATTAAGATGTGGTG | 18267               | 18291    | ACGTACATGTCTTATAGCTTCTTCG  | 2.028                |
| 7             | SARS-CoV-2         | 20996               | 21020    | GTGATTGTGCAACTGTACATACAGC | 23638               | 23662    | ACCAAGTGACATAGTGTAGGCAATG  | 2.667                |
| 8             | SARS-CoV-2         | 26098               | 26122    | ATTGTTGATGAGCCTGAAGAACATG | 28480               | 28504    | ATTGGTGTTAATTGGAACGCCTTGT  | 2.407                |
| 2             | human <i>RPP30</i> | 90889888            | 90889912 | CTTGTCATCGCATTCTGTCATGTG  | 90891190            | 90891214 | AGGTGGTCCTATAGATTTTCAGAGGG | 1.327                |

**Supplementary Table 5.** Concentrations of serially diluted contrived SARS-CoV-2 samples used for analytical sensitivity and specificity testing.

| <b>Sample #</b> | <b>SARS-CoV-2 concentration (copies/<math>\mu</math>l)</b> |
|-----------------|------------------------------------------------------------|
| 1               | 1.0000E+03                                                 |
| 2               | 5.0000E+02                                                 |
| 3               | 2.5000E+02                                                 |
| 4               | 1.2500E+02                                                 |
| 5               | 6.2500E+01                                                 |
| 6               | 3.1250E+01                                                 |
| 7               | 1.5625E+01                                                 |
| 8               | 7.8125E+00                                                 |
| 9               | 3.9063E+00                                                 |
| 10              | 1.9531E+00                                                 |
| 11              | 9.7656E-01                                                 |
| 12              | 0.0000E+00                                                 |

**Supplementary Table 6.** Strain-specific relative fractions of admixed SARS-CoV-2 contrived samples used for validation of k-mer based analysis.

| Sample # | Admixture Fraction  |                                   |
|----------|---------------------|-----------------------------------|
|          | USA-WA1/2020 strain | Hong Kong/VM2000106 1/2020 strain |
| 1        | 1.00                | 0.00                              |
| 2        | 0.99                | 0.01                              |
| 3        | 0.95                | 0.05                              |
| 4        | 0.90                | 0.10                              |
| 5        | 0.75                | 0.25                              |
| 6        | 0.50                | 0.50                              |
| 7        | 0.25                | 0.75                              |
| 8        | 0.10                | 0.90                              |
| 9        | 0.05                | 0.95                              |
| 10       | 0.01                | 0.99                              |
| 11       | 0.00                | 1.00                              |
| 12       | 0.00                | 0.00                              |



**Supplementary Table 7.** Strain-specific mutations detected from admixed SARS-CoV-2 contrived samples.

| Reference position<br>NC_045512.2 | Reference base | Strain specific mutations  |              |
|-----------------------------------|----------------|----------------------------|--------------|
|                                   |                | Hong Kong/VM2000106 1/2020 | USA-WA1/2020 |
| 18060                             | C              |                            | T            |
| 21636                             | C              | T                          |              |
| 22661                             | G              | T                          |              |
| 23607                             | G              | A                          |              |
| 26729                             | T              | C                          |              |
| 27266-27292                       |                | DEL                        |              |
| 28077                             | G              | C                          |              |

**Supplementary Table 8.** Cycle threshold ( $C_T$ ) values of externally tested clinical SARS-CoV-2 samples used for sequencing.

| <b>Number</b> | <b>Viral Sample ID</b> | <b>CT Value SARS-CoV-2 qPCR</b> |
|---------------|------------------------|---------------------------------|
| 1             | 152                    | 15.36                           |
| 2             | 144                    | 16.09                           |
| 3             | 146                    | 16.37                           |
| 4             | 125                    | 19.19                           |
| 5             | 140                    | 19.48                           |
| 6             | 137                    | 19.58                           |
| 7             | 132                    | 20.58                           |
| 8             | 145                    | 20.94                           |
| 9             | 155                    | 21.08                           |
| 10            | 133                    | 21.14                           |
| 11            | 128                    | 21.45                           |
| 12            | 151                    | 22.19                           |
| 13            | 142                    | 23.07                           |
| 14            | 139                    | 23.41                           |
| 15            | 143                    | 27.16                           |
| 16            | 126                    | 28.16                           |
| 17            | 138                    | 28.54                           |
| 18            | 131                    | 28.71                           |
| 19            | 122                    | 29.08                           |
| 20            | 162                    | 29.79                           |
| 21            | 124                    | 31.30                           |
| 22            | 127                    | 32.80                           |
| 23            | 121                    | 34.30                           |
| 24            | 129                    | 34.90                           |
| 25            | 130                    | 35.50                           |
| 26            | 149                    | 35.93                           |
| 27            | 147                    | 37.31                           |
| 28            | 123                    | 38.20                           |
| 29            | 150                    | 38.35                           |
| 30            | 141                    | 39.06                           |

**Supplemental Table 9. Expected translational changes from mutations in ORF7a and ORF8 from clinical samples.**

| <b>Mutation</b>                    | 27641 C > T                        | 27670 G > T                                    | 27874 C > T                        | 27925 C > T                        | 27970 C > T                        | 28144 T > C                        |
|------------------------------------|------------------------------------|------------------------------------------------|------------------------------------|------------------------------------|------------------------------------|------------------------------------|
| <b>Translational change</b>        | S83L                               | V93F                                           | T40I                               | T11I                               | T26I                               | L84S                               |
| <b>Protein</b>                     | ORF7a                              | ORF7a                                          | ORF7b                              | ORF8                               | ORF8                               | ORF8                               |
| <b>Wild type AA</b>                | serine                             | valine                                         | threonine                          | threonine                          | threonine                          | leucine                            |
| <b>Wild type AA polarity</b>       | polar                              | nonpolar hydrophobic                           | polar                              | polar                              | polar                              | nonpolar hydrophobic               |
| <b>Wild type AA MW (Da)</b>        | 105.09                             | 117.15                                         | 119.12                             | 119.12                             | 119.12                             | 131.18                             |
| <b>Mutant AA</b>                   | leucine                            | phenylalanine                                  | isoleucine                         | isoleucine                         | isoleucine                         | serine                             |
| <b>Mutant polarity</b>             | nonpolar hydrophobic               | nonpolar aromatic                              | nonpolar hydrophobic               | nonpolar hydrophobic               | nonpolar hydrophobic               | polar                              |
| <b>Mutant MW (Da)</b>              | 131.18                             | 204.23                                         | 131.18                             | 131.18                             | 131.18                             | 105.09                             |
| <b>Change in polarity</b>          | from polar to nonpolar hydrophobic | from nonpolar hydrophobic to nonpolar aromatic | from polar to nonpolar hydrophobic | from polar to nonpolar hydrophobic | from polar to nonpolar hydrophobic | from nonpolar hydrophobic to polar |
| <b>Change in MW (Da)</b>           | 26.09                              | 87.08                                          | 12.06                              | 12.06                              | 12.06                              | -26.09                             |
| <b>Samples</b>                     | Pos_126                            | Pos_139                                        | Pos_144, Pos_146                   | Pos_138                            | Pos_132                            | Pos_145, Ctrl_001                  |
| <b>GISAID frequency (n=75,681)</b> | 31                                 | 35                                             | 40                                 | 22                                 | 66                                 | 4655                               |
| <b>GISAID %</b>                    | 0.040961404                        | 0.046246746                                    | 0.052853424                        | 0.029069383                        | 0.08720815                         | 6.150817246                        |
